# Supplementary material
Source: PubMed Central journal article supplement (PMC5971556)
Supplement: JCM.00323-18_zjm999095981s1.pdf [file JCM.00323-18_zjm999095981s1.pdf]

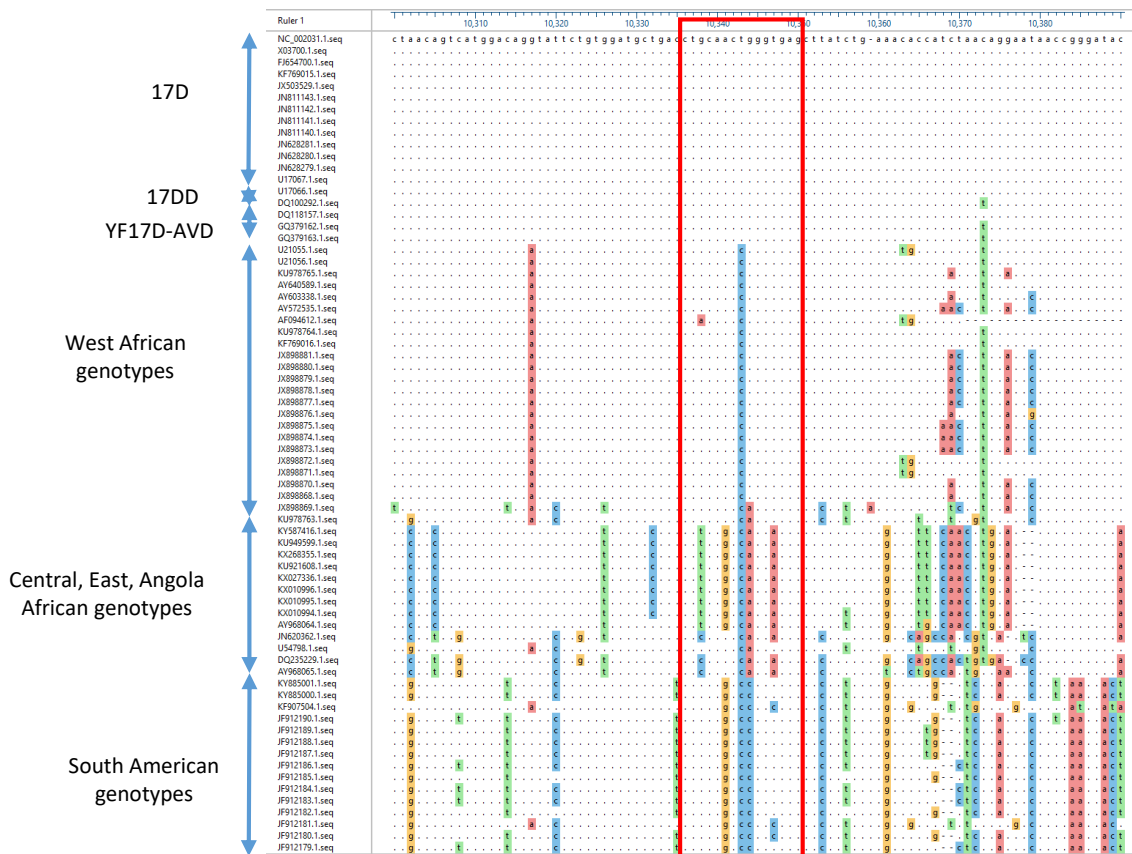

Supplementary Figure 1. Alignment of yellow fever virus single nucleotide polymorphism chosen for YFV17D specific real-time RT-PCR assay. Alignment of all YFV genomes available in GenBank as of 9 May 2017 which includes viruses isolated from 1927 to 2017 with all YFV genotypes represented. Location of selected probe 8 is encompassed within the red box. Dots in the alignment are shared nucleotides between each virus and the reference 17D (NC\_002031). GenBank accession numbers are listed on the left axis with vaccine and genotype groups demarked by blue arrows. YF17D-vaccine associated viscerotropic disease (AVD).
