# Supplementary material
Source: PubMed Central journal article supplement (PMC5971556)
Supplement: JCM.00323-18_zjm999095981s2.pdf [file JCM.00323-18_zjm999095981s2.pdf]

Supplementary Table 1. Yellow fever virus 17D primers and probes designed around single nucleotide variants in 17D genomes.

| Set | Primers and Probes <sup>1</sup> | Location <sup>2</sup> | Sequence <sup>3</sup>       |
|-----|---------------------------------|-----------------------|-----------------------------|
| 1   | Forward                         | 3226                  | TGGATACAAGGTTTCAGACGA       |
|     | Reverse                         | 3424                  | ATACCAACACCCATCACTACCA      |
|     | Probe                           | 3364                  | CGGGAAAG <u>G</u> TTATTCCTG |
| 2   | Forward                         | 3631                  | GCTGGTCGGGCAAGTAAC          |
|     | Reverse                         | 3914                  | CTTTCCTAGAAGCAACAGCATTAT    |
|     | Probe (R)                       | 3854                  | CCATCA <u>C</u> GCCACC      |
| 3   | Forward                         | 4212                  | CTGGTCTAGTGGGAGTGC          |
|     | Reverse                         | 4449                  | GGTCCCATGGCACTTTCT          |
|     | Probe                           | 4282                  | TGGAGG <u>A</u> CTCCTGAT    |
| 4   | Forward                         | 5934                  | CATCCTCTGCTGCTCAAA          |
|     | Reverse                         | 6149                  | GTCATCCCTCAGTCTCAT          |
|     | Probe                           | 6014                  | ACAAGTGAA <u>A</u> ATAATGCC |
| 5   | Forward                         | 6818                  | TCCATCCAAGACAACCAAGTG       |
|     | Reverse                         | 7094                  | TGAGGCTGACTGGGCTAT          |
|     | Probe                           | 6870                  | TTTCAG <u>C</u> GGTGGC      |
| 6   | Forward                         | 7494                  | CCTTAGGGCCGCTCATA           |
|     | Reverse                         | 7708                  | GTCGGTCCTTTTATACAACTCA      |
|     | Probe (R)                       | 7574                  | AGCATAGT <u>G</u> ATTCCC    |
| 7   | Forward                         | 10041                 | ATGGGAAAGGGGAGTG            |
|     | Reverse                         | 10239                 | CGGATACGATGGATGACTAAAT      |
|     | Probe (R)                       | 10135                 | CTCTCCAT <u>T</u> TTTCACC   |
| 8   | Forward                         | 10312                 | GTATTCTGTGGATGCTGACC        |
|     | Reverse                         | 10412                 | TATCCCGGTTTCAGGTTGTG        |
|     | Probe (R)                       | 10331                 | CTCACCC <u>A</u> GTTGCAG    |

<sup>1</sup> All probes had 5' 6-carboxyfluorescein and 3' Iowa Black FQ quencher. (R) reverse orientation.

<sup>2</sup> Genome location based on 17D genome NC\_002031

<sup>3</sup> 5' to 3' direction. Bold bases have locked nucleic acid chemistry. Underlined bases represent single nucleotide variants in the 17D genome compared to wild-type yellow fever viruses.
